# Supplementary material
Source: PubMed Central journal article supplement (PMC3677455)
Supplement: 1307384110_pnas.201307384SI.pdf [file 1307384110_pnas.201307384SI.pdf]

# Supporting Information

Li et al. 10.1073/pnas.1307384110

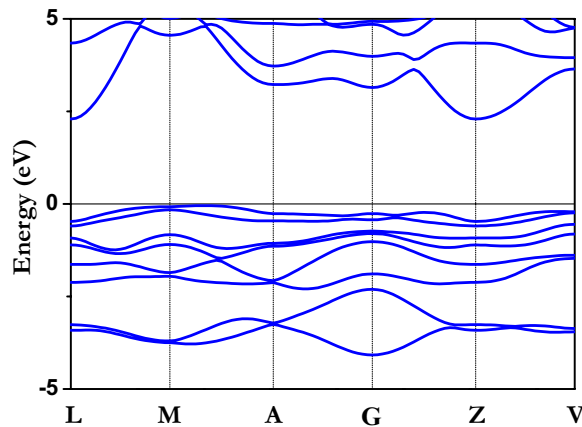

Fig. S1. Energy band of phase I at zero pressure using Perdew, Burke, and Ernzerhof exchange-correlation function and projected augmented wave pseudopotential as implemented in Vienna ab initio simulation package (1–4).

1. Kresse G, Furthmüller J (1996) Efficiency of ab-initio total energy calculations for metals and semiconductors using a plane-wave basis set. *Comput Mater Sci* 6(1):15–50.
2. Blöchl PE (1994) Projector augmented-wave method. *Phys Rev B Condens Matter* 50(24):17953–17979.
3. Kresse G, Joubert J (1999) From ultrasoft pseudopotentials to the projector augmented-wave method. *Phys Rev B* 59(3):1758–1775.
4. Perdew JP, Burke K, Ernzerhof M (1996) Generalized gradient approximation made simple. *Phys Rev Lett* 77(18):3865–3868.

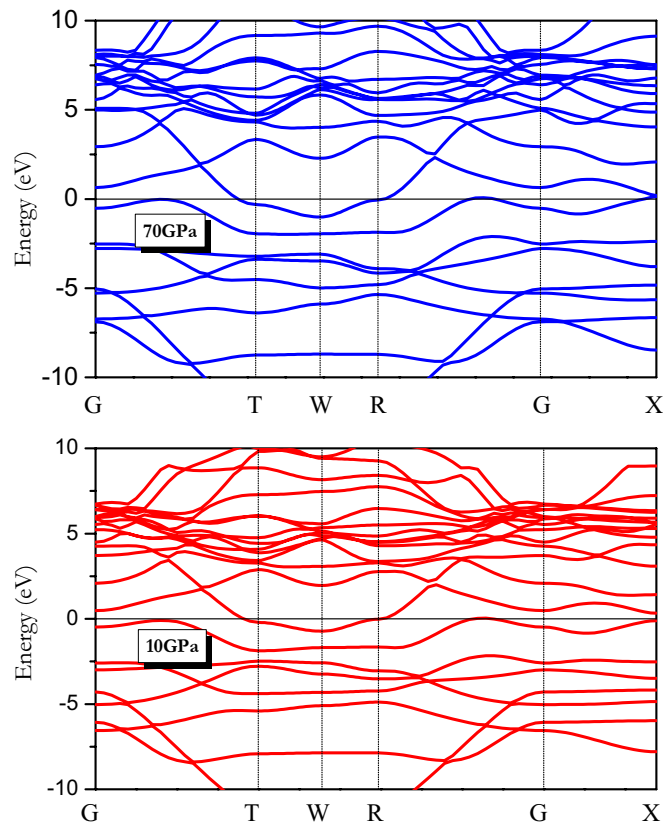

Fig. S2. Band structure of phase III at different pressure. Red line, 10 GPa; blue line, 70 GPa. Under compression, conduction band shifts to higher energy level, whereas covalence band shifts to lower level.

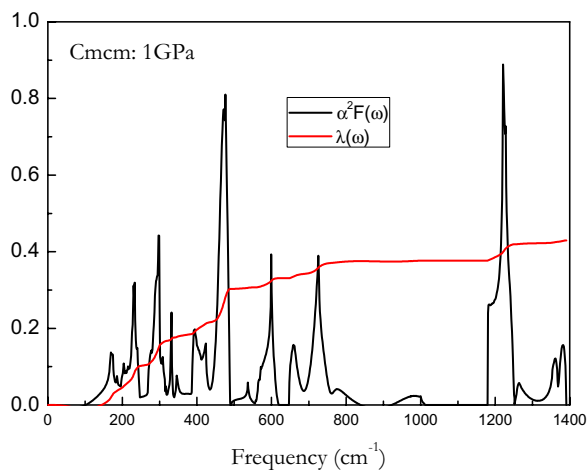

Fig. S3. The Eliashberg phonon spectral function  $\alpha^2 F(\omega)$  (black line) and integrated  $\lambda(\omega)$  (red line) for phase II at 1 GPa calculated using density functional perturbation theory as implemented in Quantum Espresso (1).

1. Giannozzi P, et al. (2009) QUANTUM ESPRESSO: A modular and open-source software project for quantum simulations of materials. *J Phys Condens Matter* 21(39):395502.

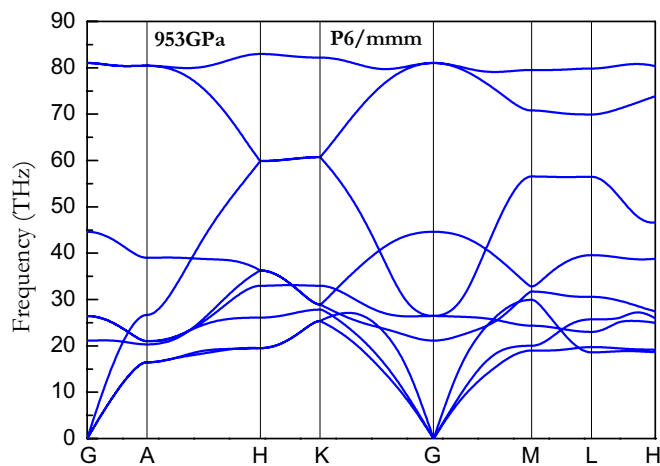

Fig. S4. Phonon spectrum of phase IV at 953 GPa from small displacement method via Phonopy code (1).

1. Togo A, Obe F, Tanaka I (2008) Ab initio up to the melting point: Anharmonicity and vacancies in aluminum. *Phys Rev B* 79(13):134106.

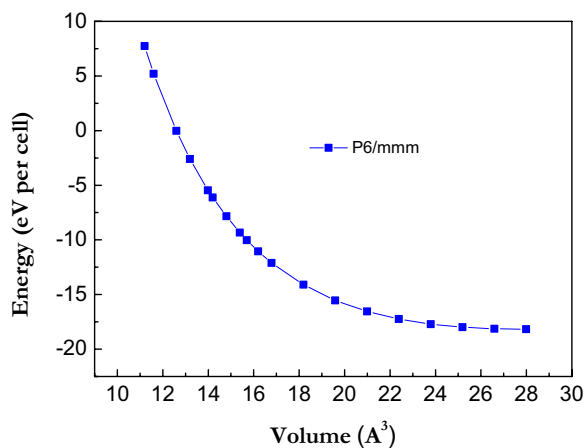

Fig. S5. Equation of state of phase IV.

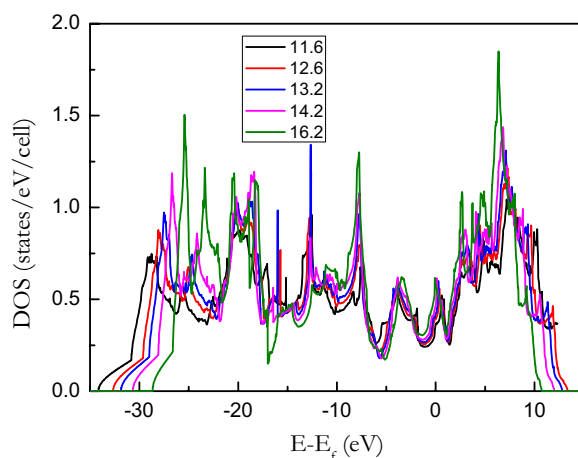

**Fig. S6.** Electronic density of states (DOS) of phase IV at different volumes (in cubic angstroms) (200 GPa to 1 TPa). As pressure increases, DOS value at Fermi level ( $E_f$ ) decreases.

**Table S1. Structures of the stable phases of  $\text{CaC}_2$**

| Pressure, GPa | Space group (no.) | Lattice parameters, $a, b, c, \alpha, \beta, \gamma; \text{\AA}, ^\circ$ |        |        | Atomic fractional coordinates |        |        |        |
|---------------|-------------------|--------------------------------------------------------------------------|--------|--------|-------------------------------|--------|--------|--------|
| 0             | $C2/m$<br>(12)    | 7.1712                                                                   | 3.8463 | 8.7162 | Ca 4i                         | 0.0425 | 0.0000 | 0.2470 |
|               |                   | 90                                                                       | 124.99 | 90     | C1 4i                         | 0.6063 | 0.0000 | 0.0594 |
|               |                   |                                                                          |        |        | C2 4i                         | 0.5142 | 0.0000 | 0.4352 |
| 4             | $Cmcm$<br>(63)    | 3.6822                                                                   | 8.6324 | 4.7360 | Ca 4c                         | 0.0000 | 0.1465 | 0.2500 |
| 15.2          | $Immm$<br>(71)    | 7.0623                                                                   | 2.6317 | 6.2697 | C 8f                          | 0.000  | 0.4376 | 0.1028 |
|               |                   | 90                                                                       | 90     | 90     | Ca 4e                         | 0.2951 | 0.0000 | 0.0000 |
|               |                   |                                                                          |        |        | C1 4i                         | 0.0000 | 0.0000 | 0.2371 |
| 105.8         | $P6/mmm$<br>(191) | 2.5412                                                                   | 2.5412 | 3.6864 | C2 4j                         | 0.5000 | 0.0000 | 0.3829 |
|               |                   | 90                                                                       | 90     | 120    | Ca 1a                         | 0.0000 | 0.0000 | 0.0000 |
|               |                   |                                                                          |        |        | C 2d                          | 0.3333 | 0.6667 | 0.5000 |

Only the fractional coordinates of symmetry inequivalent atoms are given.

**Table S2. Atomic Mulliken population analysis for phase IV at 105.8 GPa obtained using CASTEP code (1)**

| Atom | s    | p    | d    | Total | Charge |
|------|------|------|------|-------|--------|
| C    | 1.11 | 3.29 | —    | 4.39  | -0.39  |
| C    | 1.11 | 3.29 | —    | 4.39  | -0.39  |
| Ca   | 1.80 | 5.92 | 1.49 | 9.22  | 0.78   |

1. Clark SJ, et al. (2005) First principles methods using CASTEP. *Z Kristallogr* 220(5-6):567-570.
